# Supplementary material for: Warmer waters masculinize wild populations of a fish with temperature-dependent sex determination
Source: PubMed Central journal article supplement (PMC6483984; doi:10.1038/s41598-019-42944-x), 2019-04-25
Supplement: 41598_2019_42944_MOESM1_ESM.pdf [file 41598_2019_42944_MOESM1_ESM.pdf]

## **Warmer waters masculinize wild populations of a fish with temperature-dependent sex determination**

Honeycutt, J.L.<sup>1</sup>, Deck, C.A.<sup>1</sup>, Miller, S.C.<sup>2</sup>, Severance, M.E.<sup>1</sup>, Atkins, E.B.<sup>1</sup>, Luckenbach, J.A.<sup>3</sup>, Buckel, J.A.<sup>2</sup>, Daniels, H.V.<sup>2</sup>, Rice, J.A.<sup>2</sup>, Borski, R.J.<sup>1,\*</sup>, Godwin, J.<sup>1,\*</sup>

<sup>1</sup>North Carolina State University, Department of Biological Sciences, Raleigh, NC 27695, USA

<sup>2</sup>North Carolina State University, Department of Applied Ecology, Raleigh, NC 27695, USA

<sup>3</sup>Environmental and Fisheries Sciences Division, Northwest Fisheries Science Center, National Marine Fisheries Service, National Oceanic and Atmospheric Administration, 2725 Montlake Blvd E, Seattle, WA 98112, USA

\*Correspondence: [godwin@ncsu.edu](mailto:godwin@ncsu.edu) or [russell\\_borski@ncsu.edu](mailto:russell_borski@ncsu.edu)

### **SUPPLEMENTAL DATA**

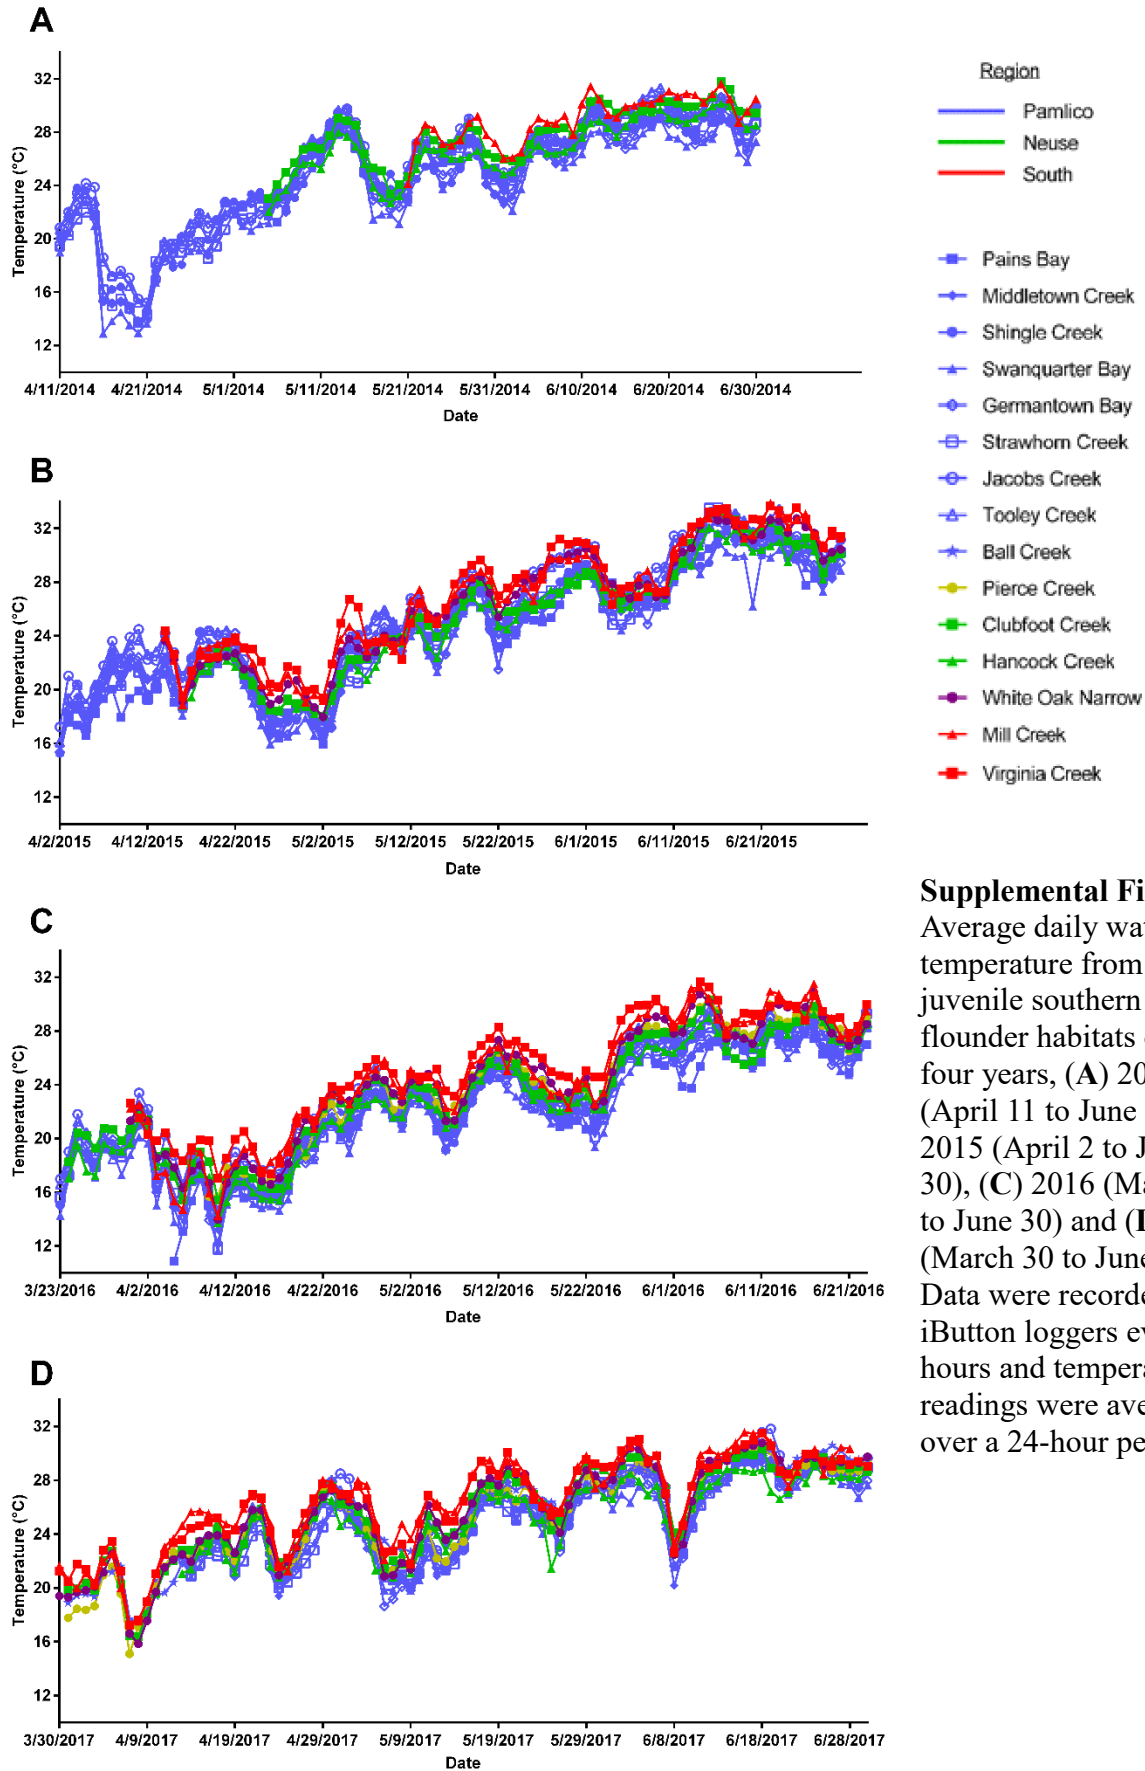

**Supplemental Figure 1.** Average daily water temperature from juvenile southern flounder habitats over four years, (A) 2014 (April 11 to June 30), (B) 2015 (April 2 to June 30), (C) 2016 (March 23 to June 30) and (D) 2017 (March 30 to June 30). Data were recorded with iButton loggers every 2 hours and temperature readings were averaged over a 24-hour period.

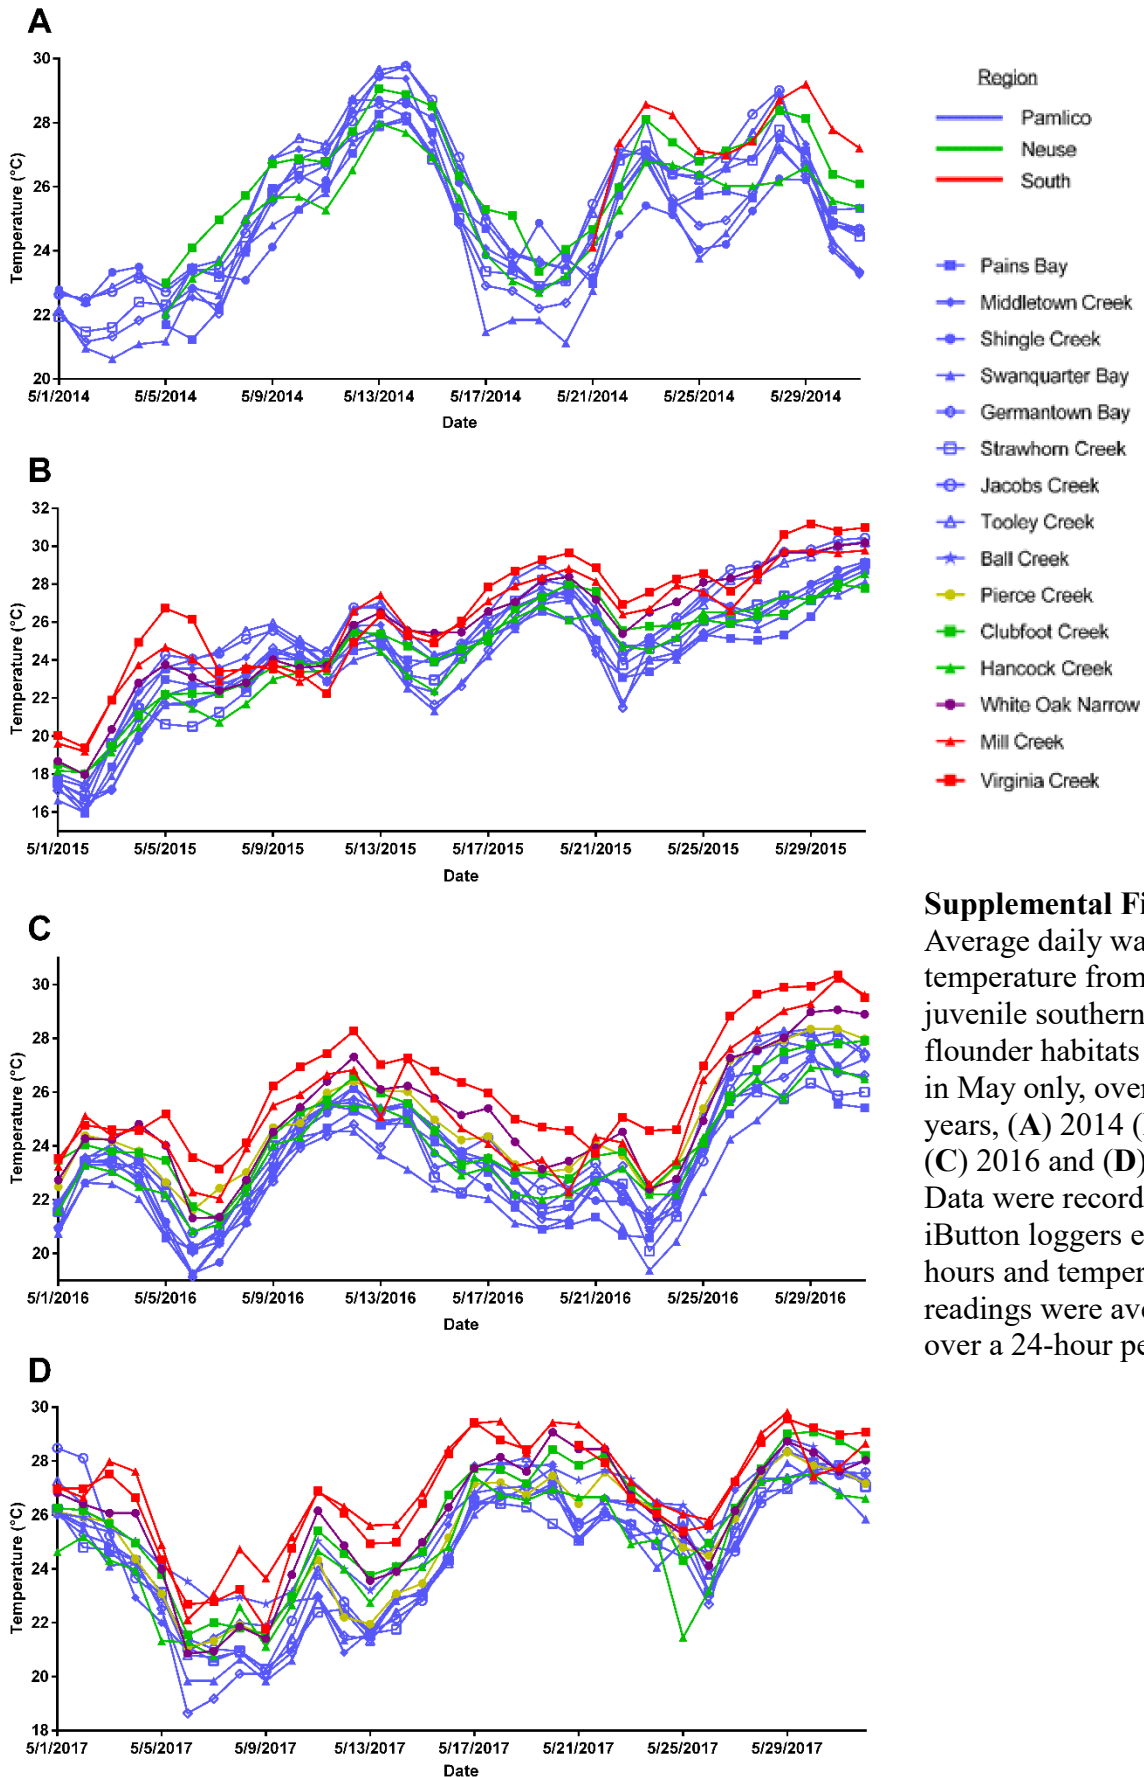

**Supplemental Figure 2.** Average daily water temperature from juvenile southern flounder habitats shown in May only, over four years, (A) 2014 (B) 2015 (C) 2016 and (D) 2017. Data were recorded with iButton loggers every 2 hours and temperature readings were averaged over a 24-hour period.

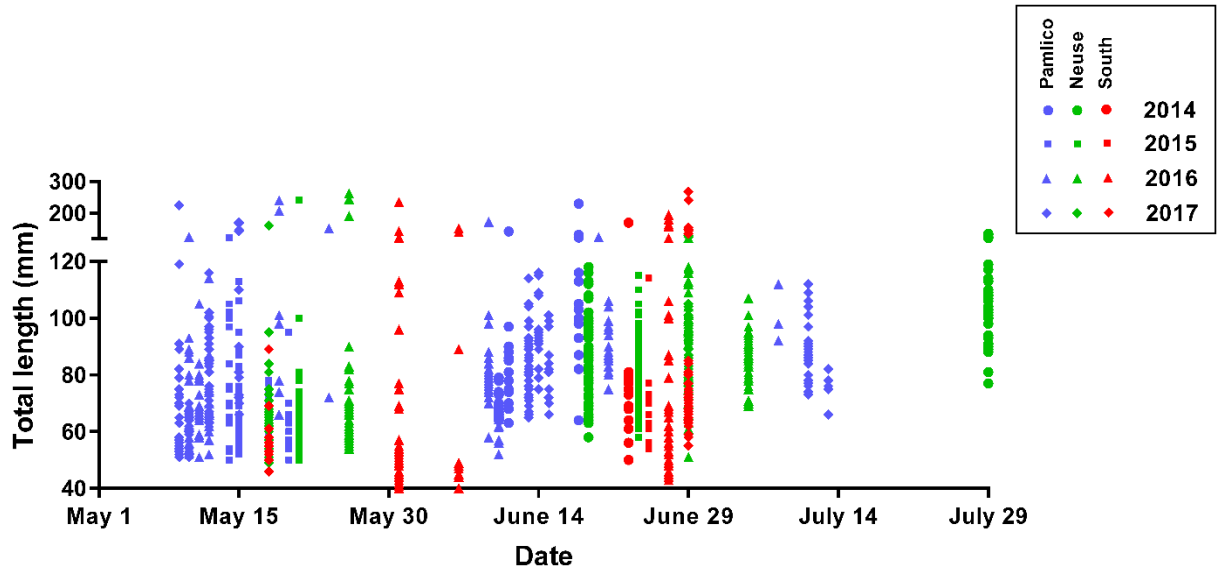

**Supplemental Figure 3.** Total length (mm TL) of juvenile southern flounder over time from collections in May to July over four years, 2014 (circles), 2015 (squares), 2016 (triangles), and 2017 (diamonds), in three different regions: Pamlico (north, blue), Neuse (intermediate, green), and South (red).

**Supplemental Table S1.** GPS Coordinates for temperature probes deployed in juvenile southern flounder habitats in North Carolina from 2014 to 2017.

| <b>Location</b>  | <b>NCDMF Station #</b> | <b>Region</b>          | <b>Water Body</b> | <b>Latitude</b> | <b>Longitude</b> |
|------------------|------------------------|------------------------|-------------------|-----------------|------------------|
| Middletown Creek | FC3                    | Pamlico                | Far Creek         | 35.474          | -76.008          |
| Pains Bay        | LSR5                   | Pamlico                | Long Shoal River  | 35.598          | -75.818          |
| Germantown Bay   | SB5                    | Pamlico                | Germantown Bay    | 35.422          | -76.446          |
| Swanquarter Bay  | SQB3                   | Pamlico                | Swanquarter Bay   | 35.385          | -76.312          |
| Shingle Creek    | SQB1                   | Pamlico                | Swanquarter Bay   | 35.414          | -76.357          |
| Strawhorn Creek  | PAR16                  | Pamlico                | South Creek       | 35.340          | -76.644          |
| Tooley Creek     | PAR27                  | Pamlico                | South Creek       | 35.347          | -76.749          |
| Jacobs Creek     | PAR31                  | Pamlico                | South Creek       | 35.336          | -76.765          |
| Ball Creek       | CS2                    | Pamlico                | Bay River         | 35.148          | -76.636          |
| Pierce Creek     | F3N                    | Pamlico/Neuse          | McCotter Bay      | 35.043          | -76.666          |
| Clubfoot Creek   | H2                     | Neuse River            | Neuse River       | 34.865          | -76.762          |
| Hancock Creek    | NR11                   | Neuse River            | Neuse River       | 34.935          | -76.852          |
| White Oak Narrow | CC1                    | White Oak River        | White Oak River   | 34.709          | -77.076          |
| Virginia Creek   | VC1                    | South of the New River | Virginia Creek    | 34.433          | -77.606          |
| Mill Creek       | SSI1                   | South of the New River | Mill Creek        | 34.518          | -77.424          |
